# Supplementary material for: Balancing Efficacy and Safety of an Anti-DLL4 Antibody through Pharmacokinetic Modulation
Source: Oxford University Press journal article supplement (doi:10.1158/1078-0432.ccr-15-1380), 2015-11-20
Supplement: 10780432ccr151380-sup-151090_1_supp_3198454_nwyy8r.pdf [file 10780432ccr151380-sup-151090_1_supp_3198454_nwyy8r.pdf]

## Supplementary Information

### Supplemental Methods

#### ***Production of anti-DLL4 F(ab')<sub>2</sub>***

For all efficacy and safety studies (with the exception of the definitive rat and monkey F(ab')<sub>2</sub> studies designed to enable first-in-human dosing; Fig. 5 and 6), anti-DLL4 F(ab')<sub>2</sub> material was made as follows, using good scientific practices. Previously purified anti-DLL4 antibody (YW152F, Ridgway et al 2006) was diluted to 5mg/mL in 50mM sodium citrate buffer, pH 3.0, and porcine gastric mucosa pepsin (#P7000; Sigma-Aldrich, St. Louis, MO) was added at a ratio of 1:100 (w/w). The antibody/enzyme solution was incubated at 37°C for 4 hours without agitation. The expected proteolytic site for pepsin on the anti-DLL4 molecule is between leucine positions 235 and 236 of the heavy chain portion of the antibody. The enzymatic digest was halted with the addition of a 5% volume of 1.5M TRIS buffer at pH 8.6, resulting in a final pH 8.0. The antibody digestion solution was then filtered using a 0.22µm filter (#567-0020; Nalgene, Waltham, MA) and dialyzed into 20mM sodium acetate buffer, pH 5.0. The F(ab')<sub>2</sub> solution was then bound to SP Sepharose high performance resin (#17-1087-05; GE Healthcare, Uppsala, Sweden), washed with 4 column volumes of 20mM sodium acetate, 0.1% Triton X-114, and washed with 4 column volumes of 20mM sodium acetate. The F(ab')<sub>2</sub> was eluted from the resin using a 20 column volume 0%-30% gradient of 1M sodium chloride in 20mM sodium acetate and formulated into 10mM histidine sulfate buffer, pH 5.8, 6% sucrose and 0.02% Tween-20 (#28320; Thermo Scientific, Rockford, IL). The anti-DLL4 F(ab')<sub>2</sub> was correctly identified by mass spectrometry at 96208.07 Da confirming the predicted cleavage site.

For the definitive safety evaluations of anti-DLL4 F(ab')<sub>2</sub> in rat and monkey (Figs. 7, 8), F(ab')<sub>2</sub> dosing material was made as follows, using Good Manufacturing Practices (GMP). Anti-DLL4 IgG1 was expressed by CHO cells grown in a non-serum containing chemically defined culture medium, secreted

into the cell culture fluid, and isolated from cellular debris by centrifugation. The IgG-containing harvested cell culture (HCCF) is purified through a series of chromatographic steps, including immobilized pepsin to generate purified anti-DLL4 F(ab')<sub>2</sub>. The purified protein was formulated by ultrafiltration and diafiltration. Anti-DLL4 F(ab')<sub>2</sub> was provided as a single-use liquid formulation containing 200 mg of anti-DLL4 F(ab')<sub>2</sub> per glass vial with a protein formulation buffered at pH 5.5 with stabilizers.

#### ***HUVEC fibrin gel bead assay***

Details of the assay have been described previously (16, 28). In the current study, conditioned medium from human skin fibroblast (SF) culture was used instead of the co-cultured SF cells on top of the fibrin gels. HUVEC sprouts were visualized by staining with AlexaFluor488-phalloidin (Invitrogen) and 4', 6-diamidino-2-phenylindole (DAPI, Sigma).

#### ***Mouse neonatal retina assay***

Details of the assay have been described previously (16). In brief, P2 CD1 mice were injected IP with PBS, anti-DLL4 IgG1, or anti-DLL4 F(ab')<sub>2</sub> at a dose of 30 mg/kg daily. Eyes were collected on P5, and dissected retinas were subjected to immunostaining procedure.

#### ***Development of xenograft tumor models***

5X10<sup>6</sup> HM7 cells were inoculated SC into 8- to 10-week-old beige nude female mice. When the average tumor size reached 150 mm<sup>3</sup> animals were sorted into groups consisting of 8-10 mice/group and subjected to affinity variants of anti-DLL4 (LM1 and HM6) administration for anti-tumor efficacy evaluations.

SW620 colon carcinoma tumors were maintained by serial SC transplantation in athymic nude mice (nu/nu, 10-11 week old female mice, Harlan). Each test mouse received a tumor fragment (1 mm<sup>3</sup>) implanted SC in the right flank.

For Calu-6 model, 10X10<sup>6</sup> tumor cells were inoculated SC into 8- to 10-week-old beige nude female mice.

### ***Histological analysis of mouse liver***

Adult CD1 mice were used to assess the liver effect of various anti-DLL4 antibodies. Following completion of the dosing period, formalin-preserved liver tissues were evaluated via microscopic anatomic pathology using hematoxylin and eosin (H&E) staining by a board-certified veterinary pathologist.

### ***Gene expression analysis of mouse livers after antibody treatment***

Following antibody treatment, mouse livers were snap frozen for RNA analysis. RNA was extracted using RNeasy Mini kit (Qiagen), and 2 µg total RNA was used to make cDNA using the Taqman-RT kit. Gene expression was analyzed using 20 ng cDNA, Taqman Gene Expression Master Mix (Applied Biosystems), and gene specific Taqman Gene Expression Assays (Applied Biosystems) on an Applied Biosystems 7500 RT-PCR system. Probe sets used for this analysis were GAPDH, CD93, Egfl7, and Lgals1. Results were normalized to GAPDH.

### ***PK studies in mice, rats and monkeys***

PK studies of anti-DLL4 F(ab')<sub>2</sub> and IgG1 in each species were conducted in separate studies. The PK study in athymic nude mice was conducted at Genentech, Inc, while the toxicokinetic studies in Sprague-Dawley rats and cynomolgus monkeys were conducted at Covance Laboratories, Inc. (Madison, WI).

### ***PK Assay Method***

For rat and cyno monkey PK study samples, recombinant human DLL4 extracellular domain (ECD) was diluted to 1 µg/mL in carbonate buffer pH 9.6 and added to a 96-well high binding polystyrene ELISA plate (Nunc 439454), 100 µL per well, and incubated overnight at 4°C. The plate was washed with wash buffer (PBS/0.05% Tween 20), and then 200 µL of assay buffer (PBS, 0.5% BSA, 0.05% polysorbate 20, 0.05% ProClin 300, pH 7.4) was added to each well. After incubation and washing, 100 µL of diluted serum sample was added and incubated for 2 hours at room temperature. The plate was washed, and captured antibodies were detected by adding 100 µL of monoclonal 10C4 anti-IgG (GNE IgG1 framework-specific (50) HRP conjugate. After incubation and washing, signal was generated by adding tetramethyl benzidine (TMB; KPL) and the reaction was terminated with 1M phosphoric acid. Absorbance was measured at 450 nm using 620 nm reference on a Tecan ELISA plate reader.

For mouse PK study samples, recombinant human DLL4 ECD was diluted in coating buffer and 25 µL per well was added to a 384-well ELISA plate (Nunc, Rochester, NY; cat # 464718), and incubated overnight at 4°C. The plate was washed with wash buffer, and then 50 µL of blocking buffer (PBS, 0.5% BSA, 0.05% Proclin 300, pH 7.4) was added to each well. Serum samples were diluted in sample buffer (PBS pH 7.4 + 0.5% BSA + 10 ppm Proclin + 0.05% Tween 20 + 0.25% CHAPS + 5 mM EDTA + 0.35M NaCl). After plate was washed, 25 µL of diluted serum sample was added onto the plate and incubated for 2 hours at room temperature with gentle agitation. The plate was washed, and captured analytes were detected by 25 µL of HRP- conjugated goat anti-human IgG F(ab')<sub>2</sub> fragment specific or goat anti-human IgG, Fcg fragment specific reagents (Jackson ImmunoResearch, West Grove, PA; cat # 109-036-097 for anti-DLL4 F(ab')<sub>2</sub>, and cat # 109-036-098 for intact hulG1). After incubation at room temperature for 1 hour with gentle agitation followed by washing, signal was generated by adding 25 µL of 3,3',5,5' tetramethylbenzidine (TMB-E); (Moss, Inc; Pasadena, MD, cat TMBE-100) and the reaction was

terminated with 25mL of 1M phosphoric acid. Absorbance was measured at 450 nm using 620 nm as reference on a MultiSkan Ascent (Thermo, Waltham, MA) plate reader. The absorbance values were then analyzed with 4-p fit equations to calculate the concentration.

#### *Bridging Anti-Therapeutic Antibody (ATA) Assay Method*

Anti-DLL4 F(ab')<sub>2</sub> was conjugated to biotin (Pierce Sulfo-NHS-LC-biotin, Cat No. 21327) or digoxigenin (Invitrogen 3-amino-3-deoxydigoxigenin hemisuccinamide, succinimidyl ester, Catalog No. A2952, DIG). The two conjugates were incubated at a concentration of 2 µg/mL in a 1:1 stoichiometric ratio, with serum sample or control, overnight, at room temperature on an orbital mixer. 70 µL of combined F(ab')<sub>2</sub>-DIG solution in assay buffer was added to 96-well polypropylene plate (Corning Catalog No. 3365) with 70 µL of diluted serum sample. The reaction mixture was then transferred to a washed Streptavidin High Bind plate (Roche Catalogue No. 11989685001) and incubated for two hours at RT with shaking. Bound antibodies were detected by adding 100 µL of mouse monoclonal anti-DIG HRP conjugate (125 ng/mL, Jackson Catalog No. 200-032-156) to the streptavidin plate. Signal was generated by adding tetramethyl benzidine (TMB; Kirkegaard & Perry, Gaithersburg, MD), then the reaction was terminated with 1M phosphoric acid. Absorbance was measured at 450 nm/630 nm on a spectrophotometer (Tecan Sunrise). Assay Buffer was used as a negative control due to the pre-existing anti-F(ab')<sub>2</sub> antibodies observed in cynomolgus monkey serum. Hyperimmunized goat antiserum, which had been affinity purified to enrich for anti-drug CDR reactivity (Genentech, South San Francisco, CA), was used as a positive control. The anti-DLL4 CDR antibodies were added to the assay buffer at 750 ng/mL (low control) and at 125 µg/mL (high or titer control).

**Table S1: Pharmacokinetic parameters of anti-DLL4 IgG1 and F(ab')<sub>2</sub> in mouse.**

| Parameter                   | Anti-DLL4 IgG | Anti-DLL4 F(ab') <sub>2</sub> |          |
|-----------------------------|---------------|-------------------------------|----------|
| Dose                        | 20 mg/kg      | 10 mg/kg                      | 50 mg/kg |
| C <sub>max</sub> (nM)       | 3493          | 1600                          | 9160     |
| AUC <sub>0-7</sub> (day*nM) | 13427         | 276                           | 1500     |
| CL (mL/day/kg)              | 8             | 362                           | 333      |

C<sub>max</sub>: maximum concentration; AUC<sub>0-7</sub>: area under the concentration-time curve during the week following first dose administration (Day 0-Day 7); CL: clearance.

**Table S2: Pharmacokinetic parameters for anti-DLL4 F(ab')<sub>2</sub> and IgG1 in rat and monkey.**

| Compound                      | Rat          |                       |                               | Monkey       |                       |                               |
|-------------------------------|--------------|-----------------------|-------------------------------|--------------|-----------------------|-------------------------------|
|                               | Dose (mg/kg) | C <sub>max</sub> (nM) | AUC <sub>(0-7)</sub> (day*nM) | Dose (mg/kg) | C <sub>max</sub> (nM) | AUC <sub>(0-7)</sub> (day*nM) |
| Anti-DLL4 F(ab') <sub>2</sub> | 3            | 310 ± 120             | 252                           | 5            | 1270 ± 80             | 800 ± 110                     |
|                               | 10           | 1480 ± 200            | 891                           | 15           | 3620 ± 310            | 2040 ± 190                    |
|                               | 30           | 4090 ± 270            | 2710                          | 50           | 11730 ± 940           | 6400 ± 640                    |
|                               | 100          | 14100 ± 1460          | 9290                          | na           | na                    | na                            |
| Anti-DLL4 IgG1                | 1            | 280 ± 220             | 400                           | 0.2          | 33 ± 7                | 60 ± 13                       |
|                               | 3            | 387 ± 167             | 907                           | 0.8          | 147 ± 13              | 420 ± 47                      |
|                               | 10           | 1593 ± 167            | 4007                          | 3            | 560 ± 53              | 1680 ± 187                    |
|                               | 30           | 3073 ± 2193           | 10367                         | 12           | 2227 ± 287            | 7540 ± 947                    |

C<sub>max</sub>= maximum concentration; AUC<sub>0-7</sub>= area under the concentration-time curve during the week following the first dose administration (Day 0-Day 7).

**Table S3: Anti-DLL4 F(ab')<sub>2</sub> mitigates the occurrence of vascular neoplasm in rats.**

| <b>AUC 0-7<br/>(day*nM)</b> | <b>Dose level<br/>(mg/kg/wk)</b> | <b>Incidence of vascular<br/>neoplasms in skin (%)</b> | <b>AUC 0-7<br/>(day*nM)</b>         | <b>Dose level<br/>(mg/kg/wk)</b> | <b>Incidence of vascular<br/>neoplasms in skin (%)</b> |
|-----------------------------|----------------------------------|--------------------------------------------------------|-------------------------------------|----------------------------------|--------------------------------------------------------|
| <b>Anti-DLL4 IgG1</b>       |                                  |                                                        | <b>Anti-DLL4 F(ab')<sub>2</sub></b> |                                  |                                                        |
| <b>0</b>                    | <b>0</b>                         | <b>0</b>                                               | <b>0</b>                            | <b>0</b>                         | <b>0</b>                                               |
| <b>400</b>                  | <b>1</b>                         | <b>0</b>                                               | <b>NT</b>                           | <b>NT</b>                        | <b>NT</b>                                              |
| <b>907</b>                  | <b>3</b>                         | <b>7</b>                                               | <b>891</b>                          | <b>10</b>                        | <b>0</b>                                               |
| <b>4007</b>                 | <b>10</b>                        | <b>27</b>                                              | <b>2710</b>                         | <b>30</b>                        | <b>0</b>                                               |
| <b>10367</b>                | <b>30</b>                        | <b>33</b>                                              | <b>9290</b>                         | <b>100</b>                       | <b>0</b>                                               |

**A**

| CDR-L1   |    |    |    |    |    |    | CDR-L2 |    |    |    |    |    |    | CDR-L3 |    |    |    |    |  |
|----------|----|----|----|----|----|----|--------|----|----|----|----|----|----|--------|----|----|----|----|--|
| Antibody | 28 | 29 | 30 | 31 | 32 | 33 | 50     | 51 | 52 | 53 | 54 | 55 | 91 | 92     | 93 | 94 | 95 | 96 |  |
| YW152F   | D  | V  | S  | T  | A  | V  | S      | A  | S  | F  | L  | Y  | S  | Y      | T  | G  | T  | V  |  |
| LM1      | D  | V  | S  | T  | A  | V  | S      | A  | S  | F  | L  | Y  | S  | Y      | T  | A  | T  | V  |  |
| HM6      | D  | V  | S  | T  | A  | V  | S      | A  | S  | F  | L  | Y  | S  | Y      | T  | G  | T  | V  |  |

| CDR-H1   |    |    |    |    |    |    | CDR-H2 |    |    |    |    |   |    | CDR-H3 |    |    |    |    |    |    |    |    |    |     |     |     |     |
|----------|----|----|----|----|----|----|--------|----|----|----|----|---|----|--------|----|----|----|----|----|----|----|----|----|-----|-----|-----|-----|
| Antibody | 28 | 29 | 30 | 31 | 32 | 33 | 34     | 35 | 50 | 51 | 52 | A | 53 | 54     | 55 | 56 | 57 | 58 | 95 | 96 | 97 | 98 | 99 | 100 | 101 | 102 | 103 |
| YW152F   | T  | F  | T  | D  | N  | W  | I      | S  | Y  | I  | S  | P | N  | S      | G  | F  | T  | Y  | D  | N  | F  | G  | G  | Y   | F   | D   | Y   |
| LM1      | T  | F  | T  | D  | N  | W  | I      | S  | Y  | I  | S  | P | P  | S      | G  | F  | T  | Y  | D  | N  | F  | G  | G  | Y   | F   | D   | Y   |
| HM6      | T  | F  | T  | D  | N  | W  | I      | S  | Y  | I  | S  | P | N  | S      | G  | F  | T  | Y  | D  | N  | F  | G  | G  | A   | F   | D   | Y   |

**B**

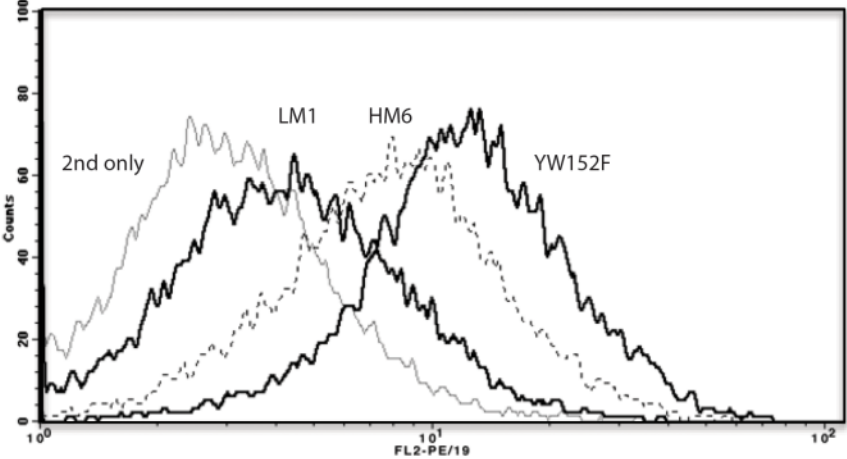

Figure S1. Generating and characterizing low affinity anti-DLL4 antibodies. (A) Sequence alignment of the original anti-DLL4 IgG1 molecule (clone YW152F) with mutant antibodies (LM1 and HM6, shown in Fig. 1). (B) FACS analysis of antibody binding to HUVECs. 2nd only= secondary only control.



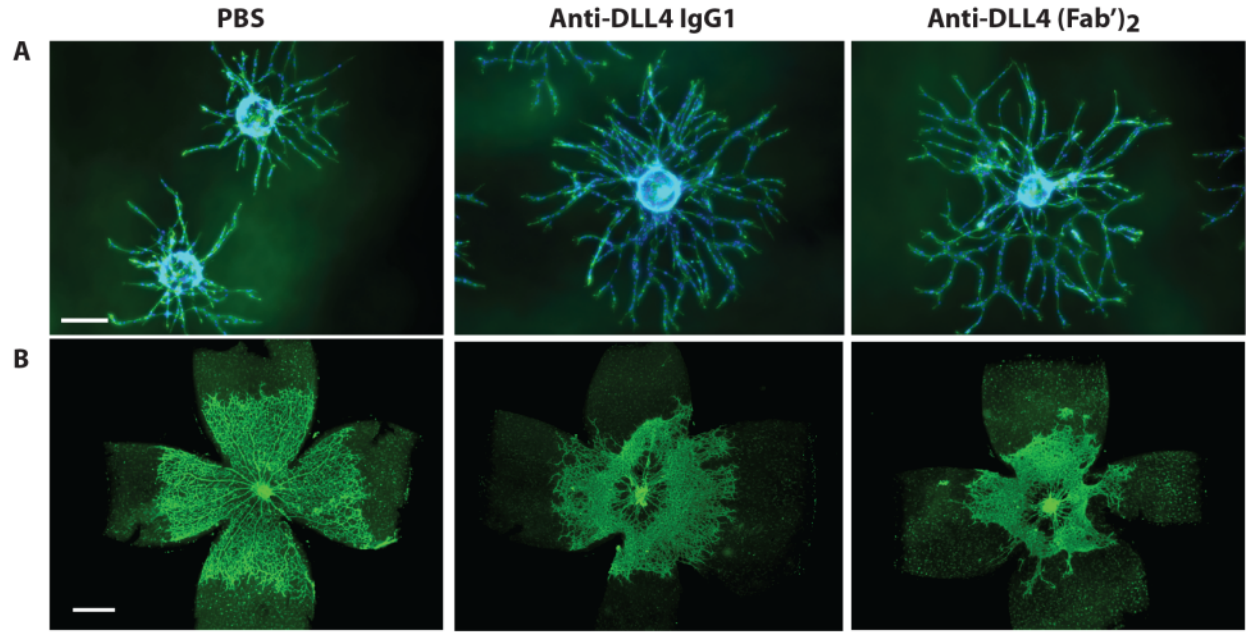

Figure S2. Characterization of anti-DLL4 F(ab')<sub>2</sub> (A) Anti-DLL4 F(ab')<sub>2</sub> caused a marked increase of angiogenic sprouting and branching of HUVECs in fibrin gels with a similar potency relative to anti-DLL4 IgG1, indicating effective DLL4 pathway blockade with the F(ab')<sub>2</sub> molecule. HUVEC sprouts were visualized by staining with DAPI and AlexaFluor488-phalloidin; Scale bar = 175 mm. (B) Anti-DLL4 F(ab')<sub>2</sub> also caused defective vascular development of neonatal mouse retina. Whole-mount retinas from P5 mice were stained with isolectin B4. Anti-DLL4 F(ab')<sub>2</sub> treatment resulted a marked increase of retinal vascular density (isolectin B4), similar to that observed with anti-DLL4 IgG1. Scale bar = 500 mm.

**A**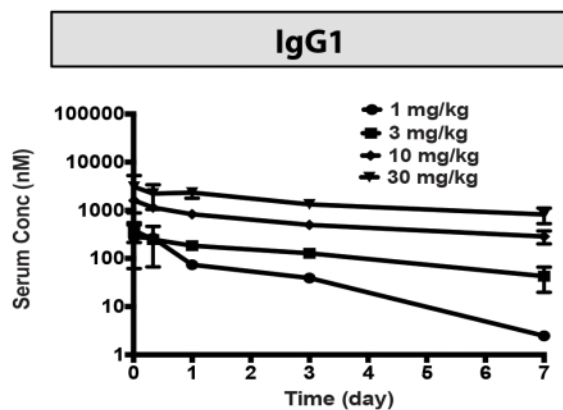**B**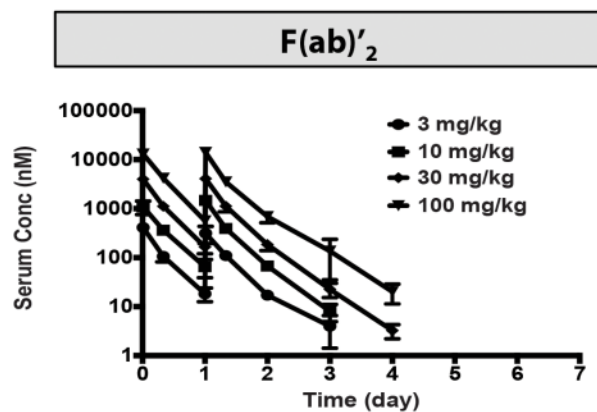

Figure S3. Pharmacokinetic profile of anti-DLL4 IgG1 and F(ab')<sub>2</sub> in rat toxicity studies. Serum-concentration time data in Sprague-Dawley rats for (A) anti-DLL4 IgG1 using a weekly dosing schedule and (B) anti-DLL4 F(ab')<sub>2</sub> using a 2 on/5 off dosing schedule.

**A**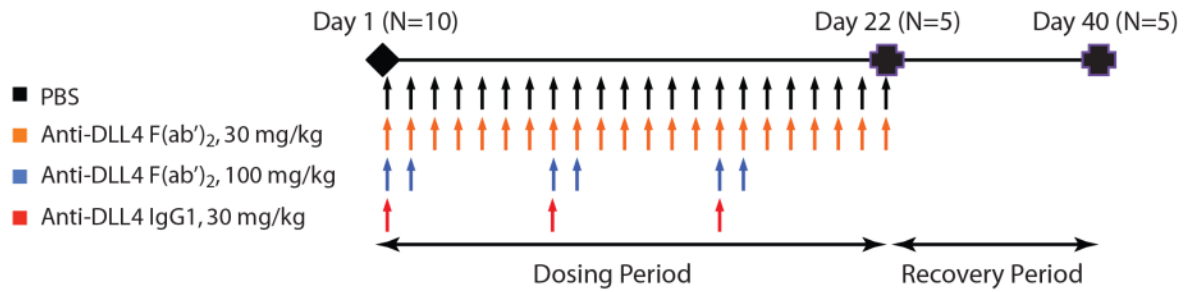**B**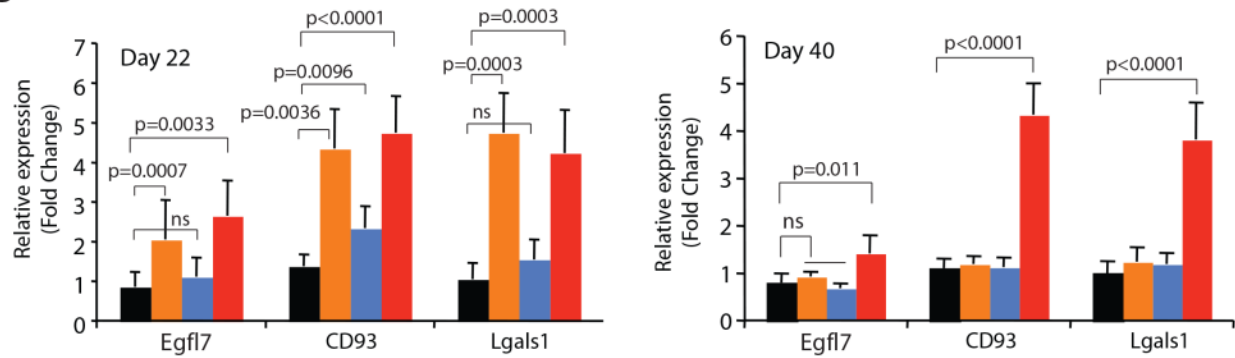**C**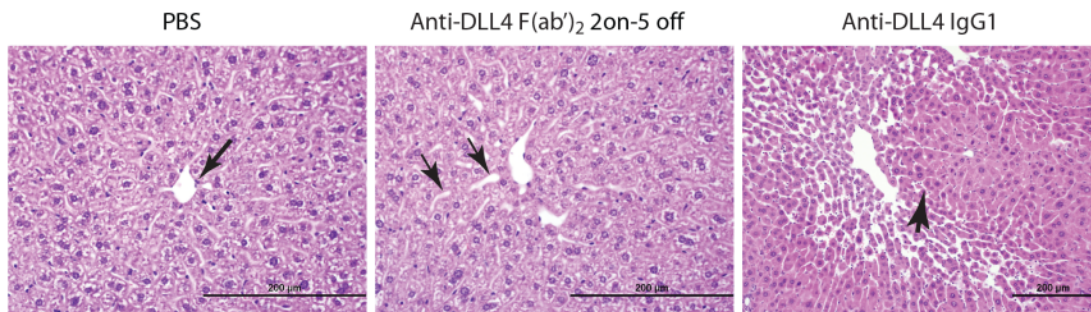

Figure S4. Mitigation of liver toxicity in mice with anti-DLL4 F(ab')<sub>2</sub>. (A) Depiction of the experimental design/dosing regimens used to compare the impact of anti-DLL4 F(ab')<sub>2</sub> and IgG1 on mouse liver. (B) Liver gene expression changes previously shown to be associated with anti-DLL4 treatment were evaluated as a direct readout of DLL4 pathway inhibition. Results are represented as fold change in mRNA levels (mean ± SEM), n=5/group. Two-tailed unpaired t test was used to calculate P values. (C) Liver histopathology was evaluated on Day 40 to assess relative toxicity of anti-DLL4 F(ab')<sub>2</sub> versus IgG1 following intermittent or continuous exposure at the same cumulative weekly dose. Scale bar= 200 μm. Left panel, normal mouse liver, arrow indicates the central vein. Middle panel, minimally dilated hepatic sinusoids (arrows) observed following F(ab')<sub>2</sub> treatment. Right panel, IgG1 induced a more severely dilated central vein and hepatic sinusoids as well as a hyperplastic nodule (arrow).

**A**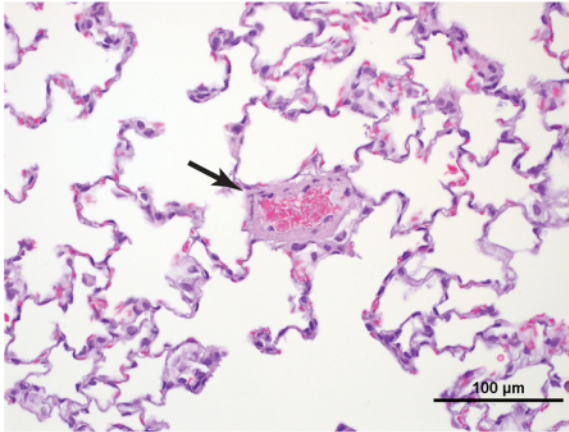**B**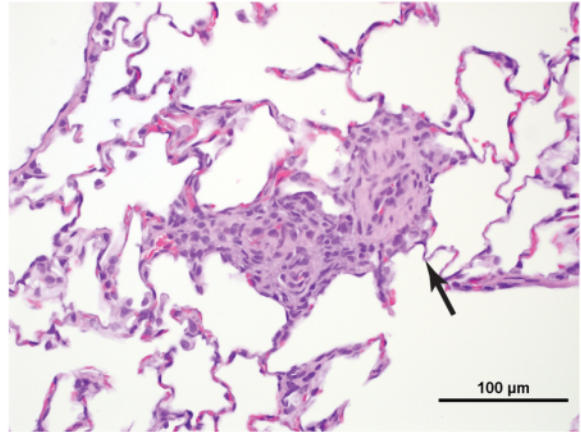**C**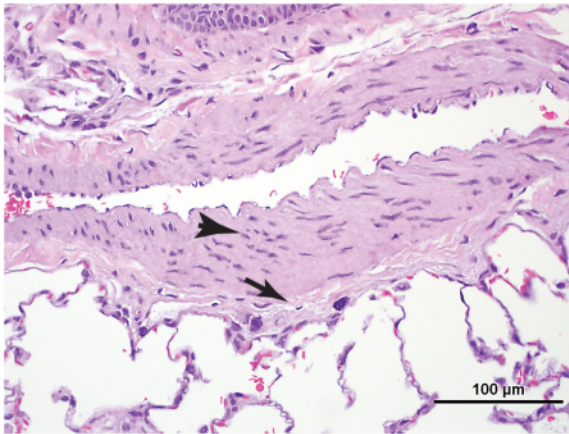**D**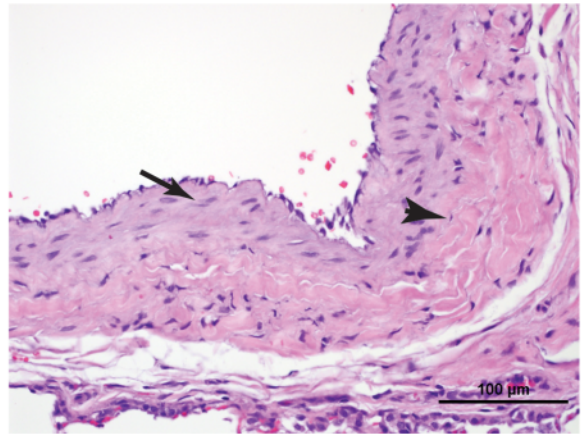

Figure S5. Novel toxicities identified with anti-DLL4 F(ab')<sub>2</sub> in rats. (A) Normal lung in a vehicle-treated rat; pulmonary small artery (arrow). (B) Hypercellularity and hypertrophy of muscularis layer of small pulmonary artery (arrow) in the lung of a rat treated with anti-DLL4 F(ab')<sub>2</sub> (15 mg/kg/wk; 2 on/5 off schedule). (C) Normal lung and pulmonary artery in a vehicle-treated rat after an 8-week recovery period, including the arterial muscularis layer (arrowhead) and arterial adventitial layer (arrow). (D) Reversibility of lung and pulmonary artery lesions (arterial muscularis layer, arrow) observed in a rat treated with anti-DLL4 F(ab')<sub>2</sub> (50 mg/kg/wk; 2 on/5 off schedule) after an 8-week recovery period, with the development of a fibrotic arterial adventitial layer (arrowhead). All panels are representative H&E sections from the indicated dose group.
